# Supplementary material
Source: publisher figshare collection journal article supplement (https://tandf.figshare.com/ndownloader/files/17508131)
Supplement: Supplementary file 1 [file 17508131]

**SUPPORTING INFORMATION**

**Exclusion Criteria**

Patients with any of the following criteria were excluded from the study:

- Type 1 diabetes
- Proliferative diabetic retinopathy
- Treatment with insulin <12 weeks before enrollment
- History of clinically significant renal disease (e.g., renovascular occlusive disease, nephrectomy, or renal transplant), significant dysuria caused by neurogenic bladder or benign prostatic hypertrophy, for example; urinary tract infection or genital infection
- Chronic disease requiring continuous use of systemic corticosteroids, immunosuppressants, or loop diuretics
- History of cerebrovascular attack, unstable angina, myocardial infarction, angioplasty, or serious cardiac diseases (New York Heart Association class III–IV) <12 weeks before enrollment
- Serious cardiovascular or cerebrovascular disease that might affect the administration of the study drugs or safety assessments
- Uncontrollable psychiatric disorder
- Pregnant females
- Females wishing to become pregnant or unwilling to use appropriate contraception
- Males unwilling to use appropriate contraception
- Severe trauma, severe infection, or perioperative stage
- History of drug addiction or alcohol abuse
- Malignant tumor, benign pheochromocytoma or a history of malignant tumor or benign pheochromocytoma (except patients who had not received treatment for ≥5 years or were unlikely to have recurrence)
- Known or suspected hypersensitivity to ipragliflozin or other SGLT2 inhibitors
- Prior treatment with ipragliflozin; prior or current participation in another clinical study, post-marketing study or medical device study <12 weeks before enrollment
- Inability or unwillingness to adhere to the study protocol
- Serum creatinine exceeding the upper limit of normal (ULN)
- Urinary microalbumin/creatinine ratio >300 mg/g
- Estimated glomerular filtration rate (eGFR) < 60 mL/min/1.73 m2
- Aspartate aminotransferase (AST) or alanine aminotransferase (ALT) >3 times the ULN, or total bilirubin level >2 times the ULN
- Uncontrollable severe hypertension (systolic blood pressure ≥ 180 mmHg or diastolic blood pressure ≥ 110 mmHg)
- Severe gastrointestinal disease or a history of surgery for serious gastrointestinal disease
- Presence or history of diabetic ketoacidosis or lactic acidosis
- Current hepatitis or a carrier of hepatitis B surface antigen, hepatitis C virus antibody, or known to be positive for human immunodeficiency virus (HIV) -1 and/or HIV-2
- Patients with a clinical condition which, in the opinion of the investigator, would not allow safe conduct of the study
